# Supplementary material for: Impacts of Modified Fly Ash on Soil Available Lead and Copper and Their Accumulation by Ryegrass
Source: MDPI journal article supplement (doi:10.3390/agronomy13092194), 2023-08-22
Supplement: s1 [file s1]

Archive with 1 entries (1 files):
- agronomy-2545889-supplementary.pdf
