# Supplementary material for: Impacts of Modified Fly Ash on Soil Available Lead and Copper and Their Accumulation by Ryegrass
Source: MDPI journal article supplement (doi:10.3390/agronomy13092194), 2023-08-22
Supplement: s1 [file s1 › agronomy-2545889-supplementary.pdf]

---

**Supporting Information for**

**Impacts of Modified Fly Ash on Soil Available Lead and Copper and Their  
Accumulation by Ryegrass**

Hongbiao Cui <sup>1,2,3</sup>, Xue Sheng <sup>1,2,3</sup>, Shaojun Hu <sup>1,2,3</sup>, Shuai Li <sup>1,2,3</sup>, Shiwen Zhang <sup>1,2,3</sup>, Jun Zhou <sup>4\*</sup>

<sup>1</sup> School of Earth and Environment, Anhui University of Science and Technology, Huainan 232001, China; [hbcui@aust.edu.cn](mailto:hbcui@aust.edu.cn) (H.C.); [2022200032@aust.edu.cn](mailto:2022200032@aust.edu.cn) (X.S.); [17775209610@163.com](mailto:17775209610@163.com) (S.H.); [19155440675@163.com](mailto:19155440675@163.com) (S.L.); [shwzhang@aust.edu.cn](mailto:shwzhang@aust.edu.cn) (S.Z.)

<sup>2</sup> Engineering laboratory of Anhui Province for comprehensive utilization of water and soil resources and construction of ecological protection in mining area with high groundwater level, Anhui University of Science and Technology, Huainan 232001, China

<sup>3</sup> Academician Workstation in Anhui Province, Anhui University of Science and Technology, Huainan 232001, China

<sup>4</sup> Key Laboratory of Soil Environment and Pollution Remediation, Institute of Soil Science, Chinese Academy of Sciences, Nanjing 210008, China

\* Correspondence: [zhoujun@issas.ac.cn](mailto:zhoujun@issas.ac.cn) (J.Z.).

---

## 18    **Text. S1 Characterization analysis**

19        The brunauere emmete teller specific surface area and porosity of the FA and MFA were  
20    determined by recording N<sub>2</sub> adsorption desorption isotherm at 77 K using an Auto-sorb-iQA3200-4  
21    instrument (Quantatech Corporation, USA). The particle structure and surface morphology of the FA  
22    and MFA were determined using field emission scanning electron microscopy (SEM; Quanta 400 FEG,  
23    FEI, USA). Fourier transform infrared (FTIR) spectroscopy was conducted using a Nicolet Nexus 670  
24    FTIR infrared spectrometer in the range of 600-4000 cm<sup>-1</sup> with a resolution of 2 cm<sup>-1</sup>. The crystalline  
25    components of the FA and MFA were determined by X-ray diffraction (XRD). The diffractometer  
26    (Rigaku, Ultima IV, Japan) was equipped with a graphite monochromator in the diffraction beam (at  
27    40 kV and 40 mA). XRD scans were conducted in the 2 $\theta$  range of 10°-60° with a step size of 0.02°.  
28    The solid phases were identified using Jade 6 (Material Data, Inc. CA, USA). The compositions of  
29    functional groups on the surface of the FA and MFA were determined using X-ray photoelectron  
30    spectroscopy (XPS; ESCALAB250 XI, Thermo Scientific Co., USA) with Al Ka radiation (12 kV and  
31    6 mA) at a pressure of  $5.0 \times 10^{-12}$  Pa in the analytical chamber. The XPS spectra were split and fitted  
32    using the XPSPEAK 4.1 program.  
33

---

## Text. S2 Soil lead (Pb) and copper (Cu) sequential extraction procedure

A sequential extraction procedure modified from the method of [Tessier, A.; Campbell, P.G.C.; Bisson, M. Sequential extraction procedure for the speciation of particulate trace metals. *Anal. Chem.* **1979**, *51*, 844–851] was described as follows:

(1) Exchangeable speciation (EXC): 16 mL magnesium chloride ( $1 \text{ mol L}^{-1} \text{ MgCl}_2$ ,  $\text{pH} = 7$ ) was added in a 100-mL polypropylene centrifuge tube containing  $2 \pm 0.0001 \text{ g}$  of soil sieved through a 0.15-mm mesh. The tube was shaken for 2 h at  $25 \pm 1 \text{ }^\circ\text{C}$  on an end-over mechanical shaker operating at 120 rpm. After equilibration, the suspension was centrifuged at 4000 rpm for 10 min. The supernatant was decanted and filtered through a 0.45- $\mu\text{m}$  filter and transferred into a polyethylene container and stored at  $4 \text{ }^\circ\text{C}$  until analysis.

(2) Bound to carbonates (CA): The residue from (1) was shaken with 16 mL  $1 \text{ mol L}^{-1}$  sodium acetate ( $\text{CH}_3\text{COONa}$ ), with pH adjusted to 5.0 with acetic acid ( $\text{CH}_3\text{COOH}$ ). The tube was shaken for 3 h at  $25 \pm 1 \text{ }^\circ\text{C}$ , and the extraction procedure was the same as in (1).

(3) Bound to Fe-Mn oxides (Fe-Mn): The residue from (2) was shaken with 40 mL hydroxylamine hydrochloride ( $0.04 \text{ mol L}^{-1}$ ,  $\text{NH}_2\text{OH}\cdot\text{HCl}$ ) in 25 % (v/v)  $\text{CH}_3\text{COOH}$ . The tube was heated to  $96 \pm 3 \text{ }^\circ\text{C}$  in a water bath for 6 h, and the extraction procedure was the same as in (1).

(4) Bound to organic matter (OM): 6 mL nitric acid ( $0.02 \text{ mol L}^{-1}$ ,  $\text{HNO}_3$ ) and 10 mL hydrogen peroxide (30 %  $\text{H}_2\text{O}_2$ , acidified to pH 2 with  $\text{HNO}_3$ ) were added into the residue from (3), and the mixture was heated to  $85 \pm 2 \text{ }^\circ\text{C}$  for 2 h in a water bath. Then, 6 mL  $\text{H}_2\text{O}_2$  (30 %, acidified to  $\text{pH} = 2$  with  $\text{HNO}_3$ ) was added, and the sample was heated again to  $85 \pm 2 \text{ }^\circ\text{C}$  for 3 h. After cooling, 10 mL ammonium acetate ( $3.2 \text{ mol L}^{-1}$ ,  $\text{CH}_3\text{COONH}_4$ ) in 20 % (v/v)  $\text{HNO}_3$  was added at  $25 \pm 1 \text{ }^\circ\text{C}$  for 30 min. The extraction procedure was the same as in (1).

(5) Residual (RES): The residual fraction of the certified reference material was analyzed by digestion with  $\text{HNO}_3$ -HF- $\text{HClO}_4$  (5:10:5 mL). The sum of concentrations of lead (Pb) and copper (Cu) in different speciation was compared with the concentrations obtained by total digestion. Therefore, the difference between the total and non-residual speciation was called the residual speciation.

## 61 Attachment Chart

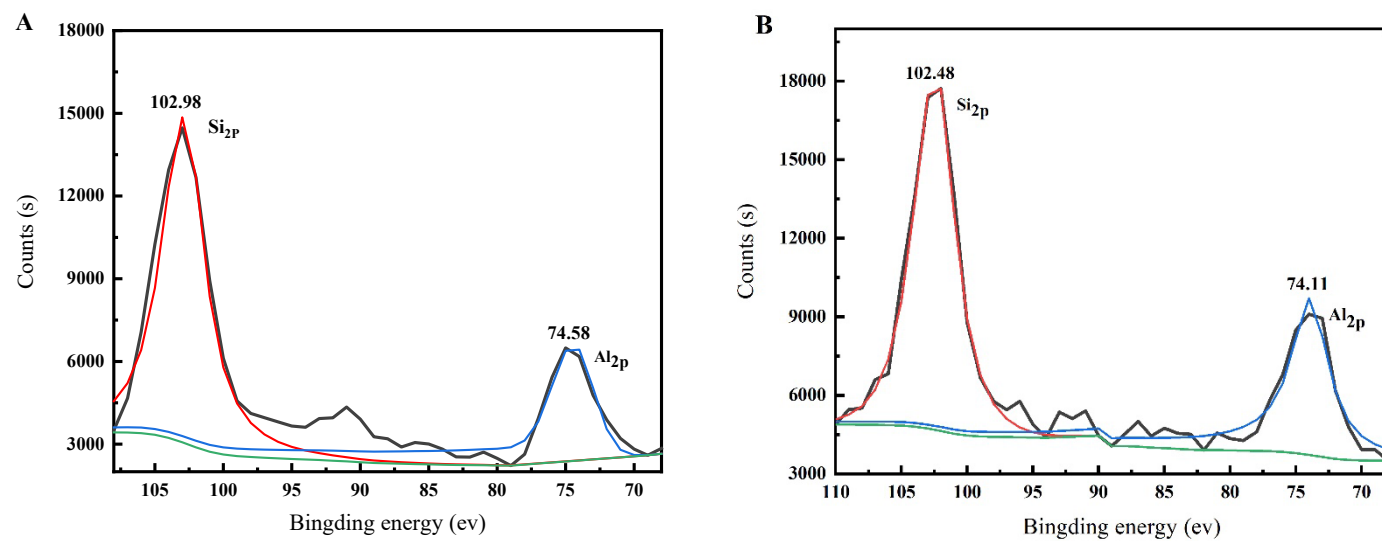

**Figure S1.** Si<sub>2p</sub> and Al<sub>2p</sub> spectrum of FA (A) and MFA (B). Note: FA: fly ash; MFA: modified fly ash.

65  
66  
67  
68

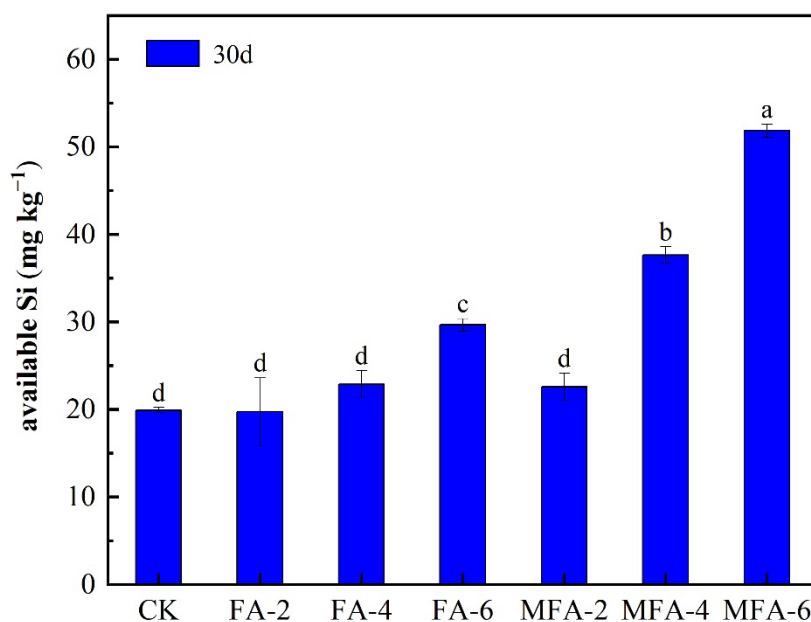

69

70 **Figure S2.** Changes in available silicon (Si) in contaminated soil amended with FA or MFA. Note: CK, the control  
71 soil; FA-2, 0.2% FA treated soil; FA-4, 0.4% FA treated soil; FA-6, 0.6% FA treated soil; MFA-2, 0.2% MFA treated  
72 soil; MFA-4, 0.4% MFA treated soil; MFA-6, 0.6% MFA treated soil. Different letters above the error bar indicate  
73 significant differences between the treatments ( $p < 0.05$ ).

74  
75  
76

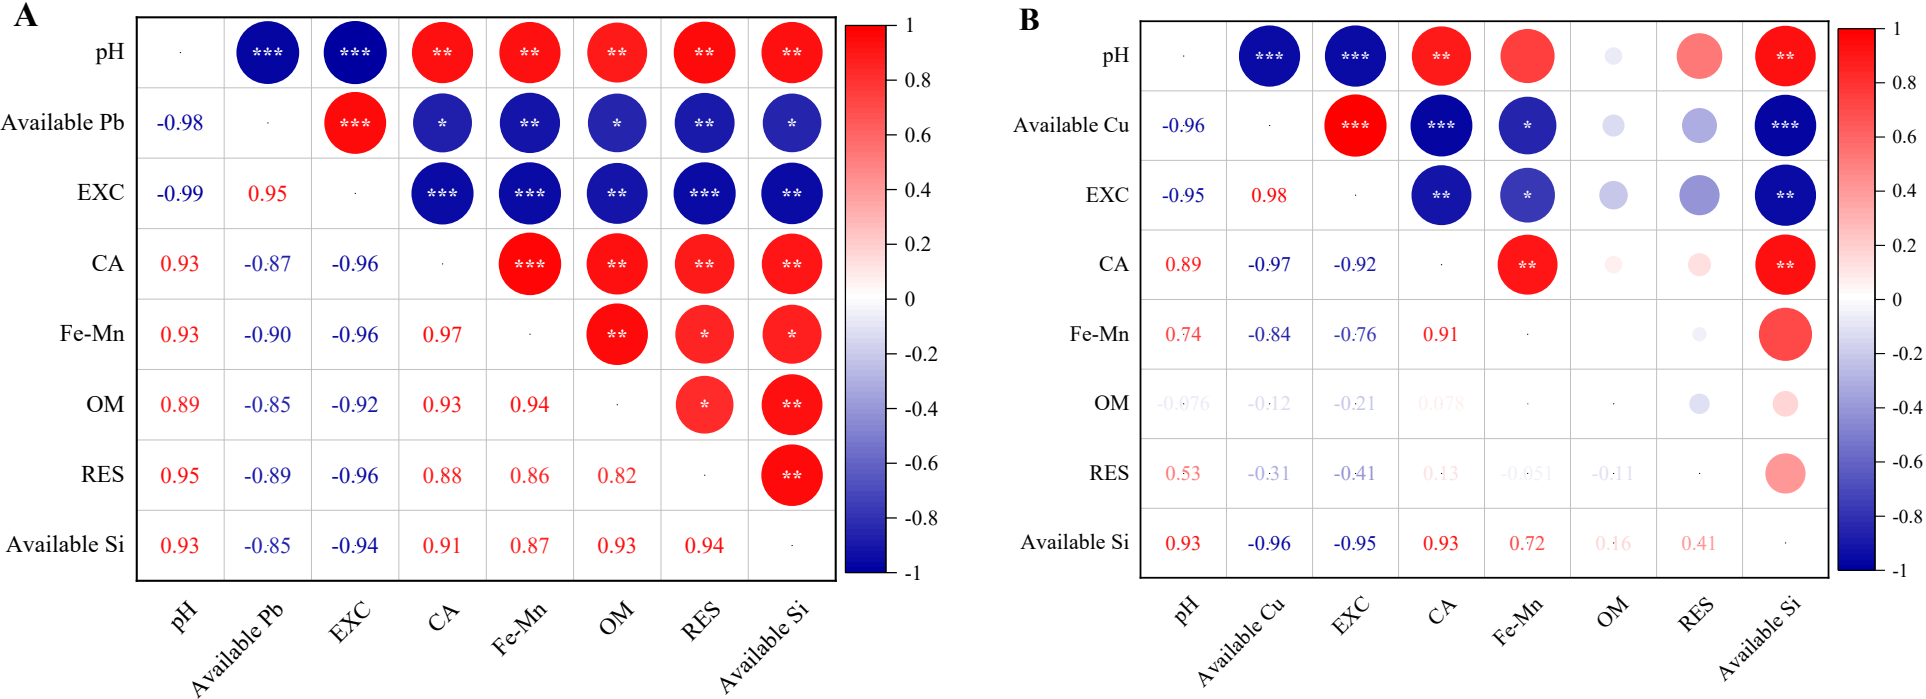

**Figure S3.** Correlations coefficients among soil pH, available Pb (A) and Cu (B), available Si, and Pb and Cu speciation. available Pb and Cu: CaCl<sub>2</sub>-extractable-Pb and Cu, EXC, exchangeable; CA, bound to carbonates; Fe-Mn, bound to iron and manganese oxide oxides; OM, bound to organic matter; RES, residual. Note: \*\*\*: Significant correlation at the 0.001 level ( $p < 0.001$ ). \*\*: Significant correlation at the 0.01 level ( $p < 0.01$ ). \*: Significant correlation at the 0.05 level ( $p < 0.05$ ).

77  
78  
79  
80  
81

82  
83  
84  
85

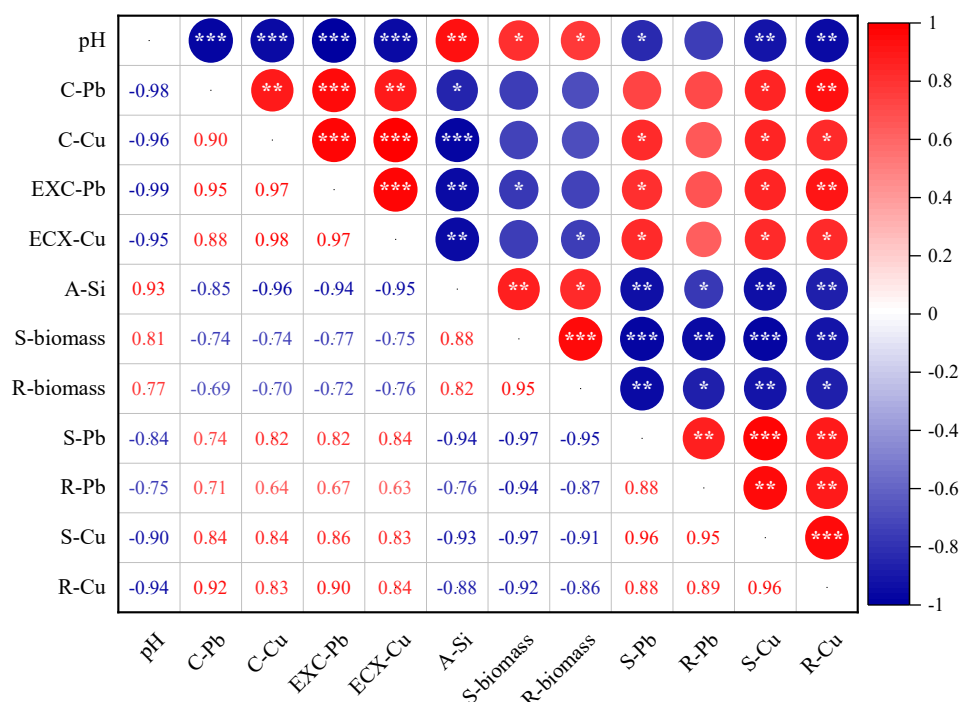

86  
87  
88  
89  
90  
91  
92  
93

**Figure S4.** Correlation coefficients among soil pH, soil CaCl<sub>2</sub>-extractable and exchangeable Pb and Cu, available Si, dry biomass in shoot and root ryegrass, accumulation of Pb and Cu in shoot and root ryegrass. C-Pb, CaCl<sub>2</sub>-extractable-Pb; C-Cu, CaCl<sub>2</sub>-extractable-Cu; EXC-Pb, exchangeable Pb; ECX-Cu, exchangeable Cu; A-Si, available Si; S-biomass, shoot dry biomass of ryegrass; R-biomass, root dry biomass of ryegrass; S-Pb, shoot Pb in ryegrass; R-Pb, root Pb in ryegrass; S-Cu, shoot Cu in ryegrass; R-Cu, root Pb in ryegrass. Note: \*\*\*: Significant correlation at the 0.001 level ( $p < 0.001$ ). \*\*: Significant correlation at the 0.01 level ( $p < 0.01$ ). \*: Significant correlation at the 0.05 level ( $p < 0.05$ ).
